# Supplementary material for: Novel green-light-emitting hyperbranched polymers with iridium complex as core and 3,6-carbazole-co-2,6-pyridine unit as branch
Source: Royal Society of Chemistry journal article supplement (doi:10.1039/b813927j), 2008-12-08
Supplement: b813927j.pdf [file b813927j.pdf]

Supporting information for

**Novel Green-Light-Emitting Hyperbranched Polymers with Iridium Complex as Core and 3,6-Carbazole-co-2,6-Pyridine Unit as Branch**

**Rong Guan, Yunhua Xu, Lei Ying, Wei Yang,\* Hongbin Wu, Qiliang Chen, Yong Cao**

*Institute of Polymer Optoelectronic Materials & Devices, Key Laboratory of Specially Functional Materials, Ministry of Education, South China University of Technology, Guangzhou 510640, China*

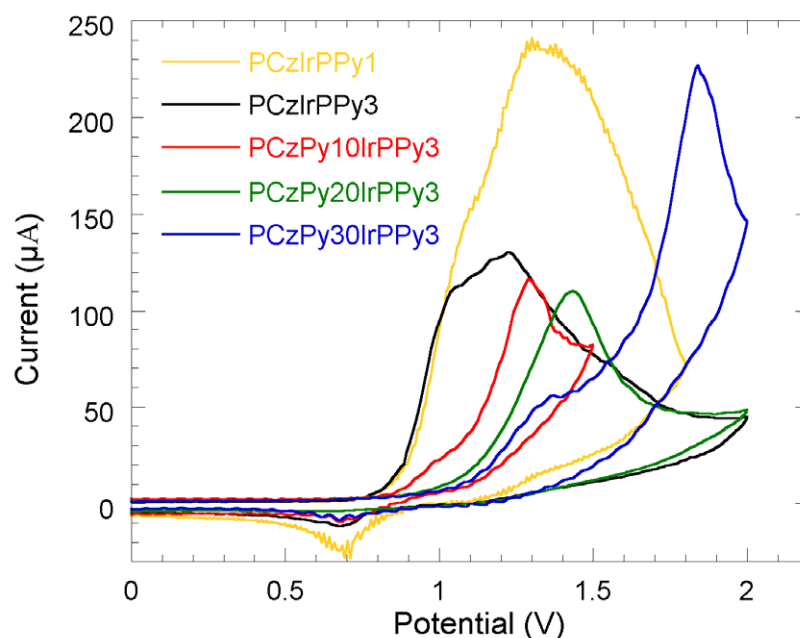

**Figure S1.** Cyclic voltammograms of copolymers in  $n\text{-Bu}_4\text{NPF}_6$  acetonitrile solution of 0.1 mol/L at room temperature
